# Supplementary material for: The Use of Whole Exome Sequencing in a Cohort of Transgender Individuals to Identify Rare Genetic Variants
Source: PubMed Central journal article supplement (PMC6934803; doi:10.1038/s41598-019-53500-y), 2019-12-27
Supplement: 41598_2019_53500_MOESM1_ESM.pdf [file 41598_2019_53500_MOESM1_ESM.pdf]

Evaluating Rare Genetic Variants Identified by Whole Exome Sequencing in a Cohort of Transgender Individuals

Authors: J. Graham Theisen, Viji Sundaram, Mary S. Filchak, Lynn P. Chorich, Megan E. Sullivan, James Knight, Hyung-Goo Kim, Lawrence C. Layman

|                                                                                                                                                                     |
|---------------------------------------------------------------------------------------------------------------------------------------------------------------------|
| A marked incongruence between one's experienced/expressed gender and natal gender of at least 6 months in duration, as manifested by at least two of the following: |
| A marked incongruence between one's experienced/expressed gender and primary and/or secondary sexual characteristics                                                |
| A strong desire to be rid of one's primary and/or secondary sexual characteristics because of a marked incongruence with one's experienced/expressed gender         |
| A strong desire for the primary and/or secondary sexual characteristics of the other gender                                                                         |
| A strong desire to be of the other gender                                                                                                                           |
| A strong desire to be treated as the other gender                                                                                                                   |
| A strong conviction that one has the typical feelings and reactions of the other gender                                                                             |

**Supplemental Table 1: DSM-V Diagnostic Criteria for Gender Dysphoria**

Evaluating Rare Genetic Variants Identified by Whole Exome Sequencing in a Cohort of Transgender Individuals

Authors: J. Graham Theisen, Viji Sundaram, Mary S. Filchak, Lynn P. Chorich, Megan E. Sullivan, James Knight, Hyung-Goo Kim, Lawrence C. Layman

| Gene         | Genomic location | Position <sup>^</sup> | Wild-Type | Variant | Het <sup>◊</sup> (n) | Hom <sup>□</sup> (n) |
|--------------|------------------|-----------------------|-----------|---------|----------------------|----------------------|
| ABCA12       | 2q35             | 215866455             | A         | G       | 1                    | 0                    |
| ACAP1        | 17p13.1          | 7252464               | C         | T       | 1                    | 0                    |
| ACVR1B       | 12q13.13         | 52370254              | C         | T       | 1                    | 0                    |
| ADAMTS13     | 9q34.2           | 136291419             | A         | G       | 1                    | 0                    |
| ADGRV1       | 5q14.3           | 89948215              | T         | C       | 1                    | 0                    |
| AHCTF1       | 1q44             | 247030568             | T         | C       | 1                    | 0                    |
| AHSA2        | 2p15             | 61412695              | T         | G       | 1                    | 0                    |
| AKR1C3       | 10p15.1          | 5144369               | A         | G       | 1                    | 0                    |
| AKT1S1       | 19q13.33         | 50376378              | G         | A       | 1                    | 0                    |
| AP1B1        | 22q12.2          | 29747207              | C         | T       | 1                    | 0                    |
| APBB1IP      | 10p12.1          | 26825142              | C         | A       | 3                    | 0                    |
| ARHGAP40     | 20q11.23         | 37272368              | A         | G       | 1                    | 0                    |
| ARHGEF17     | 11q13.4          | 73020830              | A         | T       | 1                    | 0                    |
| ARMC12       | 6p21.31          | 35716397              | T         | A       | 1                    | 0                    |
| ASMT         | Xp22.33          | 1734120               | C         | T       | 0                    | 1*                   |
| ATP5J2-PTCD1 | 7q22.1           | 99022588              | A         | G       | 1                    | 0                    |
| ATRN         | 20p13            | 3584887               | T         | C       | 1                    | 0                    |
| ATRX         | Xq21.1           | 76952091              | T         | A       | 1                    | 0                    |
| BAMBI        | 10p12.1          | 28971203              | T         | A       | 1                    | 0                    |
| BAZ2B        | 2q24.2           | 160295537             | G         | A       | 1                    | 0                    |
| BOK          | 2q37.3           | 242501871             | C         | T       | 1                    | 0                    |
| BRD4         | 19p13.12         | 15366150              | G         | A       | 1                    | 0                    |
| BTBD17       | 17q25.1          | 72353787              | G         | A       | 1                    | 0                    |
| C19orf67     | 19p13.12         | 14194360              | C         | T       | 1                    | 0                    |
| C2CD3        | 11q13.4          | 73849935              | T         | A       | 1                    | 0                    |
| C2CD4D       | 1q21.3           | 151811152             | G         | A       | 1                    | 0                    |
| C7           | 5p13.1           | 40947795              | G         | C       | 1                    | 0                    |
| CAPN2        | 1q41             | 223931837             | A         | G       | 1                    | 0                    |
| CCDC14       | 3q21.1           | 123680116             | C         | T       | 1                    | 0                    |
| CCDC141      | 2q31.2           | 179912087             | A         | G       | 1                    | 0                    |
| CCDC168      | 13q33.1          | 103381950             | G         | A       | 1                    | 0                    |
| CCL18        | 17q12            | 34397891              | G         | T       | 1                    | 0                    |
| CCSER1       | 4q22.1           | 91549362              | G         | C       | 1                    | 0                    |
| CDC42BPG     | 11q13.1          | 64595038              | C         | T       | 1                    | 0                    |
| CDH8         | 16q21            | 61858936              | T         | C       | 1                    | 0                    |
| CDK12        | 17q12            | 37618361              | G         | C       | 1                    | 0                    |
| CHD3         | 17p13.1          | 7797514               | G         | T       | 1                    | 0                    |
| CILP         | 15q22.31         | 65489439              | G         | A       | 1                    | 0                    |
| CKAP2        | 13q14.3          | 53049199              | G         | A       | 1                    | 0                    |
| COG5         | 7q22.3           | 106938734             | T         | C       | 1                    | 0                    |

|         |                |           |   |   |   |   |
|---------|----------------|-----------|---|---|---|---|
| COL4A4  | 2q36.3         | 227953499 | G | A | 1 | 0 |
| COL4A4  | 2q36.3         | 227872163 | A | G | 1 | 0 |
| COL5A1  | 9q34.3         | 137534115 | C | A | 1 | 0 |
| CPQ     | 8q22.1         | 97892144  | A | T | 1 | 0 |
| CSDC2   | 22q13.2        | 41968123  | A | G | 1 | 0 |
| CSRNP1  | 3p22.2         | 39185154  | C | T | 1 | 0 |
| CTNBL1  | 20q11.23       | 36405783  | A | G | 1 | 0 |
| CXorf57 | Xq22.3         | 105876423 | C | T | 0 | 1 |
| DDX17   | 22q13.1        | 38897221  | G | A | 1 | 0 |
| DEFB129 | 20p13          | 209997    | A | G | 1 | 0 |
| DGCR6L  | 22q11.21       | 20366867  | G | T | 1 | 0 |
| DNAH14  | 1q42.12        | 225586760 | C | T | 1 | 0 |
| DNAH3   | 16p12.3        | 21042566  | T | C | 1 | 0 |
| DNAH3   | 16p12.3        | 21042508  | C | G | 1 | 0 |
| DNAH6   | 2p11.2         | 85008699  | G | T | 1 | 0 |
| DNER    | 2q36.3         | 230578982 | C | A | 1 | 0 |
| DOT1L   | 19p13.3        | 2223379   | C | T | 1 | 0 |
| DSCAM   | 21q22.2        | 41414573  | G | T | 3 | 0 |
| DSCAM   | 21q22.2        | 41414571  | C | T | 3 | 0 |
| DSCAM   | 21q22.2        | 41710222  | T | G | 1 | 0 |
| DSCAML1 | 11q23.3        | 117340673 | C | T | 1 | 0 |
| EFHD2   | 1p36.21        | 15753774  | G | T | 1 | 0 |
| EGF     | 4q25           | 110890223 | G | C | 1 | 0 |
| EHD4    | 15q15.1        | 42235310  | C | T | 1 | 0 |
| EYS     | 6q12           | 66204756  | C | A | 1 | 0 |
| F13B    | 1q31.3         | 197026454 | C | T | 1 | 0 |
| FAM184B | 4p15.32-p15.31 | 17711264  | T | A | 1 | 0 |
| FAM19A4 | 3p14.1         | 68802062  | G | C | 1 | 0 |
| FAM21C  | 10q11.22       | 46252504  | G | C | 1 | 0 |
| FBLN2   | 3p25.1         | 13649667  | T | A | 1 | 0 |
| FCGBP   | 19q13.2        | 40383820  | C | T | 2 | 0 |
| FCGBP   | 19q13.2        | 40383904  | C | T | 1 | 0 |
| FCGBP   | 19q13.2        | 40366204  | G | A | 1 | 0 |
| FLNC    | 7q32.1         | 128489556 | C | T | 1 | 0 |
| FLRT2   | 14q31.3        | 86089168  | T | A | 1 | 0 |
| FSTL5   | 4q32.2         | 162459410 | T | G | 1 | 0 |
| FYCO1   | 3p21.31        | 46008362  | C | G | 1 | 0 |
| GAL3ST3 | 11q13.1        | 65810801  | A | G | 1 | 0 |
| GFI1B   | 9q34.13        | 135865217 | G | A | 1 | 0 |
| GLDC    | 9p24.1         | 6587253   | G | C | 1 | 0 |
| GOLGA8J | 15q13.2        | 30381959  | C | G | 2 | 0 |

|           |          |           |   |   |   |    |
|-----------|----------|-----------|---|---|---|----|
| GOLGA8K   | 15q13.3  | 32685713  | T | C | 1 | 0  |
| GOLGA8M   | 15q13.1  | 28947450  | T | C | 1 | 0  |
| GPR63     | 6q16.1   | 97247010  | C | T | 1 | 0  |
| GPR85     | 7q31.1   | 112724668 | C | G | 1 | 0  |
| GRIN1     | 9q34.3   | 140036549 | C | G | 1 | 0  |
| GSC       | 14q32.13 | 95236291  | G | C | 1 | 0  |
| GTPBP6    | Xp22.33  | 224532    | C | A | 0 | 1* |
| GTPBP6    | Xp22.33  | 228205    | C | T | 1 | 0  |
| H2AFY2    | 10q22.1  | 71835533  | G | A | 1 | 0  |
| HCN3      | 1q22     | 155252457 | C | G | 1 | 0  |
| HCN4      | 15q24.1  | 73622060  | C | T | 1 | 0  |
| HHIPL1    | 14q32.2  | 100125875 | C | G | 1 | 0  |
| HMCES     | 3q21.3   | 129023538 | C | T | 1 | 0  |
| IGLL1     | 22q11.23 | 23922357  | C | G | 1 | 0  |
| IQSEC3    | 12p13.33 | 271157    | A | C | 1 | 0  |
| IRS2      | 13q34    | 110435525 | C | T | 1 | 0  |
| KCNG2     | 18q23    | 77659592  | G | A | 1 | 0  |
| KCNK3     | 2p23.3   | 26950997  | T | C | 1 | 0  |
| KDM4E     | 11q21    | 94758794  | T | C | 1 | 0  |
| KHNYN     | 14q12    | 24900976  | C | T | 1 | 0  |
| KIAA0586  | 14q23.1  | 58927786  | G | A | 1 | 0  |
| KIAA1107  | 1p22.1   | 92647175  | T | C | 1 | 0  |
| KIAA1109  | 4q27     | 123192588 | A | C | 1 | 0  |
| KIAA1549L | 11p13    | 33667512  | G | A | 1 | 0  |
| KIF19     | 17q25.1  | 72348048  | C | G | 1 | 0  |
| KMT2D     | 12q13.12 | 49427026  | T | A | 1 | 0  |
| KRTAP1-5  | 17q21.2  | 39182996  | A | G | 1 | 0  |
| LAMA2     | 6q22.33  | 129591785 | C | T | 1 | 0  |
| LAMB1     | 7q31.1   | 107615774 | T | C | 1 | 0  |
| LARP1     | 5q33.2   | 154181721 | C | T | 1 | 0  |
| LETM1     | 4p16.3   | 1816276   | C | A | 1 | 0  |
| LGI3      | 8p21.3   | 22005920  | G | A | 1 | 0  |
| LGR6      | 1q32.1   | 202266673 | G | A | 1 | 0  |
| LRBA      | 4q31.3   | 151356772 | C | T | 1 | 0  |
| MAGI3     | 1p13.2   | 113933885 | C | G | 1 | 0  |
| MAP4K3    | 2p22.1   | 39499479  | G | C | 1 | 0  |
| MDM1      | 12q15    | 68707490  | T | C | 1 | 0  |
| METTL25   | 12q21.31 | 82780626  | T | G | 1 | 0  |
| MFAP4     | 17p11.2  | 19289660  | A | G | 1 | 0  |
| MFSD6L    | 17p13.1  | 8700983   | G | A | 1 | 0  |
| MTFR1     | 8q13.1   | 66620183  | C | G | 1 | 0  |

|          |          |           |   |   |   |    |
|----------|----------|-----------|---|---|---|----|
| NAT1     | 8p22     | 18080344  | T | C | 1 | 0  |
| NCKAP1   | 2q32.1   | 183817934 | T | A | 1 | 0  |
| NCKAP5L  | 12q13.12 | 50186581  | C | T | 1 | 0  |
| NDST3    | 4q26     | 119064715 | T | G | 1 | 0  |
| NFAM1    | 22q13.2  | 42783044  | T | C | 1 | 0  |
| NFKBIZ   | 3q12.3   | 101571995 | A | C | 1 | 0  |
| NGDN     | 14q11.2  | 23946539  | A | G | 1 | 0  |
| NLRP3    | 1q44     | 247587601 | C | A | 1 | 0  |
| NOL12    | 22q13.1  | 38083977  | G | C | 1 | 0  |
| NPIP3    | 16p12.2  | 21416089  | C | T | 1 | 0  |
| NR1D2    | 3p24.2   | 24001229  | C | A | 1 | 0  |
| NSUN5P2  | 7q11.23  | 72436394  | A | G | 1 | 0  |
| NUDT19   | 19q13.11 | 33183507  | C | T | 1 | 0  |
| OGFR     | 20q13.33 | 61443743  | T | C | 1 | 0  |
| OR2T12   | 1q44     | 248458721 | G | A | 1 | 0  |
| OR5A1    | 11q12.1  | 59211124  | C | G | 1 | 0  |
| OTOG     | 11p15.1  | 17667311  | T | G | 1 | 0  |
| P2RY8    | Xp22.33  | 1585099   | C | G | 0 | 1* |
| PATL1    | 11q12.1  | 59423514  | G | A | 2 | 0  |
| PDE3A    | 12p12.2  | 20803464  | A | G | 1 | 0  |
| PDE8B    | 5q13.3   | 76721613  | G | A | 1 | 0  |
| PFN3     | 5q35.3   | 176827225 | C | G | 1 | 0  |
| PGC      | 6p21.1   | 41704612  | A | G | 1 | 0  |
| PGM2L1   | 11q13.4  | 74049623  | G | T | 1 | 0  |
| PLBD2    | 12q24.13 | 113812705 | T | C | 1 | 0  |
| PLCXD1   | Xp22.33  | 208284    | T | C | 0 | 1* |
| PLCXD1   | Xp22.33  | 207345    | G | A | 0 | 1* |
| PLEC     | 8q24.3   | 145001865 | G | C | 1 | 0  |
| PLEKHG2  | 19q13.2  | 39908575  | G | A | 1 | 0  |
| POLQ     | 3q13.33  | 121209209 | G | A | 1 | 0  |
| PPARGC1B | 5q32     | 149213068 | C | T | 1 | 0  |
| PPP2R3B  | Xp22.33  | 299424    | C | T | 1 | 0  |
| PRAMEF7  | 1p36.21  | 12980073  | G | T | 1 | 0  |
| PRRC2C   | 1q24.3   | 171509504 | G | A | 1 | 0  |
| PTPRR    | 12q15    | 71286493  | T | C | 1 | 0  |
| RASA4B   | 7q22.1   | 102125585 | C | T | 3 | 0  |
| RGAG1    | Xq23     | 109696838 | C | G | 0 | 1* |
| RIMS3    | 1p34.2   | 41107405  | T | C | 1 | 0  |
| RIMS4    | 20q13.12 | 43384843  | G | A | 1 | 0  |
| RLF      | 1p34.2   | 40697193  | C | G | 1 | 0  |
| ROCK2    | 2p25.1   | 11341207  | C | T | 1 | 0  |

|         |             |           |   |   |   |   |
|---------|-------------|-----------|---|---|---|---|
| RTEL1   | 20q13.33    | 62321182  | G | A | 1 | 0 |
| RYR3    | 15q13.3-q14 | 33825537  | G | A | 1 | 0 |
| SDK2    | 17q25.1     | 71443796  | C | T | 1 | 0 |
| SDK2    | 17q25.1     | 71357877  | T | C | 1 | 0 |
| SETBP1  | 18q12.3     | 42532819  | G | C | 1 | 0 |
| SGPP2   | 2q36.1      | 223289368 | G | T | 1 | 0 |
| SHPRH   | 6q24.3      | 146273568 | A | G | 1 | 0 |
| SIN3B   | 19p13.11    | 16976363  | G | A | 1 | 0 |
| SLC18A1 | 8p21.3      | 20038420  | G | T | 1 | 0 |
| SLFN14  | 17q12       | 33875323  | G | A | 1 | 0 |
| SPAG9   | 17q21.33    | 49074033  | G | A | 1 | 0 |
| SPHK1   | 17q25.1     | 74383224  | C | T | 1 | 0 |
| SPRN    | 10q26.3     | 135237026 | C | G | 1 | 0 |
| SRRM3   | 7q11.23     | 75864530  | G | A | 1 | 0 |
| SSC5D   | 19q13.42    | 56001745  | C | A | 1 | 0 |
| STARD9  | 15q15.2     | 42983286  | T | G | 1 | 0 |
| STRA6   | 15q24.1     | 74494529  | T | G | 1 | 0 |
| SYNPO   | 5q33.1      | 150028774 | G | A | 1 | 0 |
| SYNPO2L | 10q22.2     | 75408070  | G | A | 1 | 0 |
| TBC1D3F | 17q12       | 34581905  | A | G | 1 | 0 |
| TBC1D5  | 3p24.3      | 17349600  | C | T | 1 | 0 |
| TCFL5   | 20q13.33    | 61492458  | C | T | 1 | 0 |
| TDRD12  | 19q13.11    | 33301036  | T | C | 1 | 0 |
| TDRD6   | 6p12.3      | 46656668  | A | G | 1 | 0 |
| THEG    | 19p13.3     | 374349    | C | A | 1 | 0 |
| TMPRSS6 | 22q12.3     | 37462272  | A | G | 1 | 0 |
| TMPRSS9 | 19p13.3     | 2425456   | G | A | 1 | 0 |
| TNN     | 1q25.1      | 175046693 | A | G | 1 | 0 |
| TNRC18  | 7p22.1      | 5427886   | C | T | 1 | 0 |
| TOPBP1  | 3q22.1      | 133336050 | G | C | 1 | 0 |
| TRAPPC9 | 8q24.3      | 141321451 | G | C | 1 | 0 |
| TTF1    | 9q34.13     | 135261962 | C | T | 1 | 0 |
| UBR4    | 1p36.13     | 19415318  | G | A | 1 | 0 |
| UNC13C  | 15q21.3     | 54630632  | C | T | 1 | 0 |
| USH2A   | 1q41        | 215814050 | C | T | 1 | 0 |
| VAV2    | 9q34.2      | 136649442 | A | C | 1 | 0 |
| VPS11   | 11q23.3     | 118949558 | T | G | 1 | 0 |
| WNT11   | 11q13.5     | 75898144  | A | G | 1 | 0 |
| ZBTB7C  | 18q21.1     | 45555662  | T | C | 1 | 0 |
| ZC3H7B  | 22q13.2     | 41742112  | G | A | 1 | 0 |
| ZC3HAV1 | 7q34        | 138793885 | C | T | 1 | 0 |



|         |          |           |   |   |   |   |
|---------|----------|-----------|---|---|---|---|
| ZFHX4   | 8q21.13  | 77765857  | A | C | 1 | 0 |
| ZHX2    | 8q24.13  | 123964676 | G | T | 1 | 0 |
| ZNF132  | 19q13.43 | 58945166  | C | T | 1 | 0 |
| ZNF276  | 16q24.3  | 89789805  | T | G | 1 | 0 |
| ZNF311  | 6p22.1   | 28963376  | T | C | 1 | 0 |
| ZNF492  | 19p12    | 22847609  | C | T | 1 | 0 |
| ZNF512  | 2p23.3   | 27826034  | A | T | 1 | 0 |
| ZNF578  | 19q13.41 | 53014748  | A | G | 1 | 0 |
| ZNF652  | 17q21.33 | 47390063  | C | T | 1 | 0 |
| ZNF699  | 19p13.2  | 9407313   | C | T | 1 | 0 |
| ZNF785  | 16p11.2  | 30594038  | G | A | 1 | 0 |
| ZNF800  | 7q31.33  | 127013411 | G | C | 1 | 0 |
| ZSCAN10 | 16p13.3  | 3139155   | G | T | 1 | 0 |
| ZSCAN5A | 19q13.43 | 56733120  | G | T | 1 | 0 |
| ZXDA    | Xp11.21  | 57936299  | G | A | 1 | 0 |

**Supplemental Table 2: Missense Variants Called by Whole Exome Sequencing**

^Position based on GRCh37.p13 Primary Assembly

◊Heterozygous

□Homozygous

\*Reported as hemizygous in a transgender female subject

**The Use of Whole Exome Sequencing in a Cohort of Transgender Individuals to Identify Rare Genetic Variants**

J. Graham Theisen, Viji Sundaram, Mary S. Filchak, Lynn P. Chorich, Megan E. Sullivan, James Knight, Hyung-Goo Kim, Lawrence C. Layman

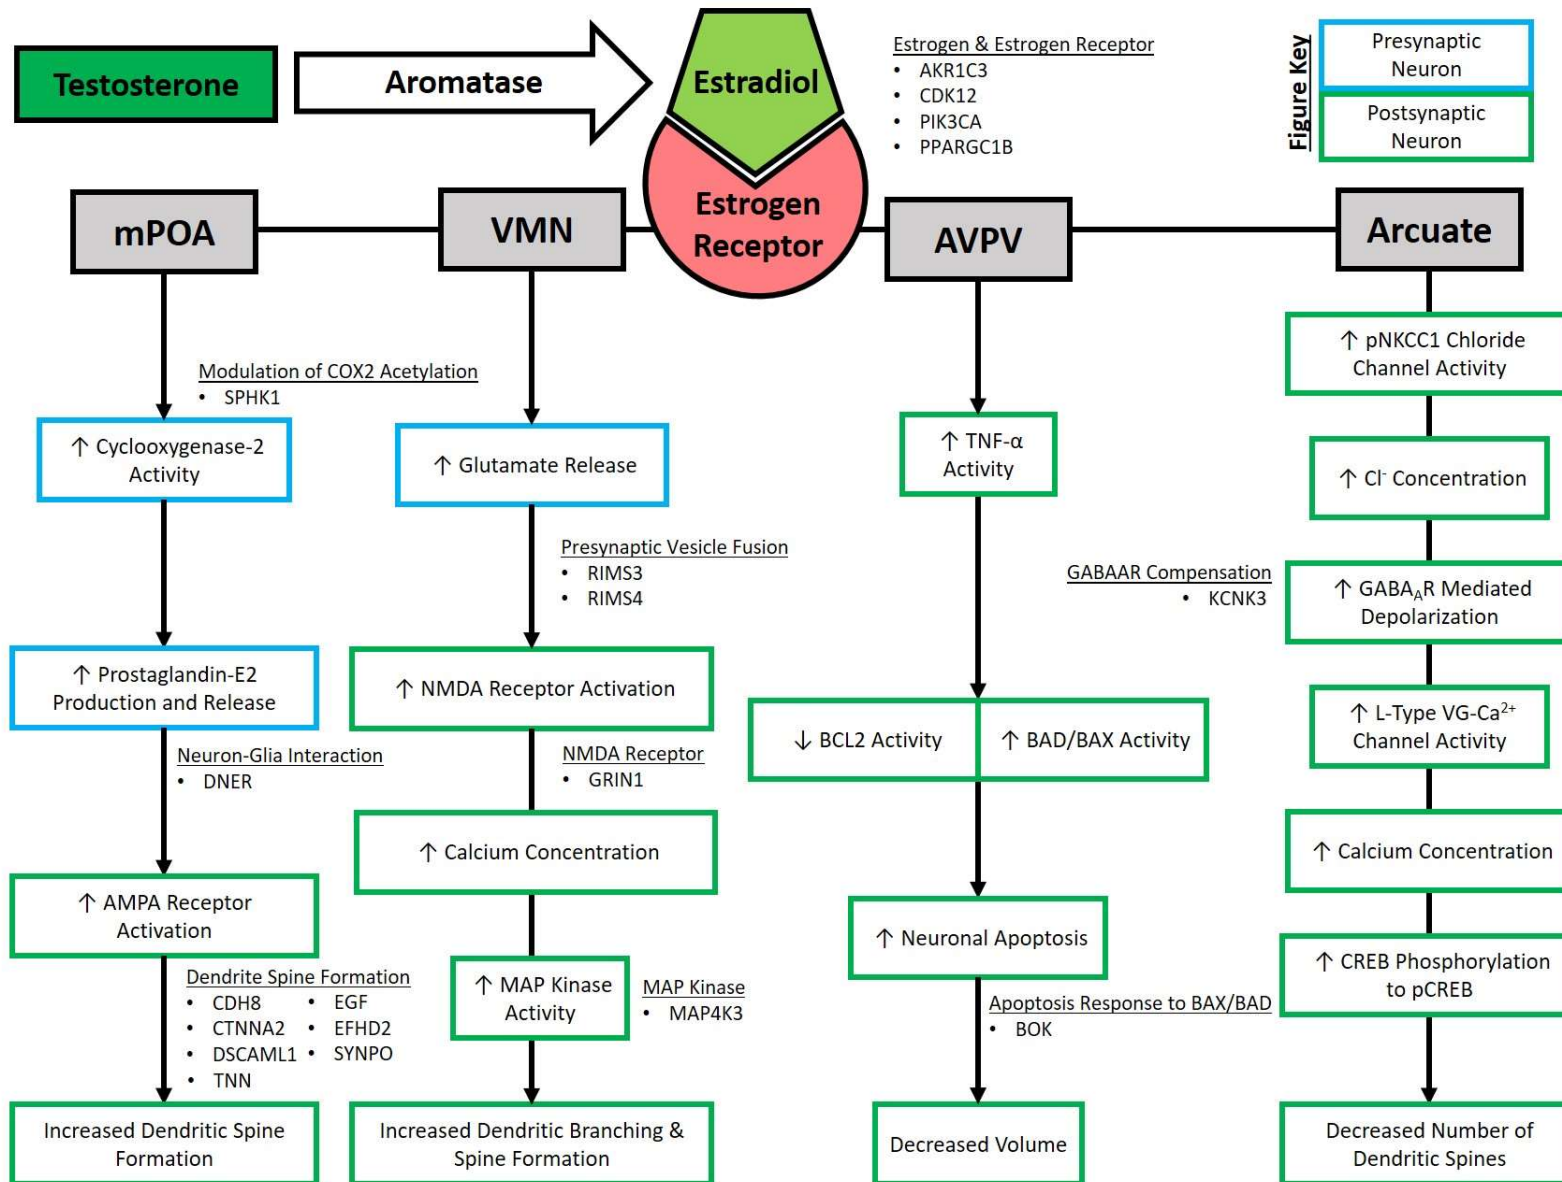

Supplemental Figure 1: Diagram of estradiol receptor activated neurodevelopmental pathways in sexually dimorphic brain regions, including the ventromedial nucleus (VMN), the medial preoptic area (mPOA), the anteroventral periventricular nucleus (AVPV), and the arcuate nucleus. Candidate genes are listed where their descriptions, functions, or ontologies suggested a potential association with these pathways.
